# Supplementary material
Source: MDPI journal article supplement (https://www.mdpi.com/2071-1050/12/12/4828)
Supplement: s1 [file s1]

An assessment of the econometric studies on the development of renewable energy sources to support the EU 2020-2030 climate and energy framework.

## A review of the econometric literature on RE development

## Key elements 2020-2030 EU climate and energy strategic framework and coverage of econometric literature

**Bibliometric study:** “renewable energy development” “econometric analysis” 153 documents related to 1329 keywords from 2002 to 2019

To support the RE guidelines provided by the EU 2020-2030 framework

Which technologies and how?

Why?

Under what conditions?

Econometric techniques to represent in a mathematical and objective way the RES deployment and RES impact in an economic, environmental and social level.

Identifying some niches of study.

RES play a fundamental role in the strategic framework.

RES in general  
Wind and solar  
Bioenergy

Public policies: FITs and RPS  
Cost-Benefit studies

Niche: electricity transmission grid and incentives based on competitive mechanisms

GHG emissions (CO<sub>2</sub> as the main driver)

Energy security

Niche: employment econometric literature

Electricity market

Niche: impact that RES have on competitiveness of countries and electricity prices
